# Supplementary material
Source: publisher figshare collection journal article supplement (https://gsapubs.figshare.com/ndownloader/files/34781335)
Supplement: Supplementary file 1 [file 34781335]

## Sheet: Standard model scenario result
Data S2. Results of our pCO2 and 87Sr/86Sr mass balance model scenario
Age [Ma]	W = weatherability [unitless]	fvolc = CO2 release from volcanic degassing [mol C/yr]	fworg = CO2 release from weathering or organic matter [mol C/yr]	fborg = CO2 captured by organic matter burial [mol C/yr]	fwsil = CO2 captured by silicate weathering [mol C/yr]	moc = total inorganic carbon in ocean-atmosphere system [mol C]	pCO2 = atmospheric CO2 concentration (ppmv)	cwf = climate weathering factor [unitless]	fwp = flux of phosphate to the oceans [mol P/yr]	fbp = outflux of phosphate from oceans due to burial [mol P/yr]	mop = total phosphate in the ocean-atmosphere system [mol P]	rr = 87Sr/86Sr of the riverine flux [unitless]	fwsr = flux of Sr to the oceans [mol Sr/yr]	fhyd = hydrothermal fraction of volcanism	ro = 87Sr/86Sr of seawater [unitless]
486	1	6000000000000	10000000000000	9990000000000	6000000000000	1.61e+19	5000	1	30000000000	30000000000	3000000000000000	0.7106	30000000000	10500000000	0.7091
485.828	1	6000000000000	1.00006e+13	9.99032e+12	6.00038e+12	1.61017e+19	5001.06	1.00006	3.00019e+10	3.0001e+10	3000098684304850	0.710598	3.00019e+10	10500000000	0.70909
485.656	1	6000000000000	10001258650279	9.9909e+12	6.00076e+12	1.61034e+19	5002.11	1.00013	3.00038e+10	3.00027e+10	3000272701167910	0.710597	3.00038e+10	10500000000	0.709079
485.484	1	6000000000000	1.00019e+13	9.99151e+12	6.00112e+12	1.6105e+19	5003.12	1.00019	3.00056e+10	3.00045e+10	3000454759360400	0.710595	3.00056e+10	10500000000	0.70907
485.312	1	6000000000000	1.00024e+13	9.9921e+12	6.00147e+12	1.61066e+19	5004.08	1.00024	3.00073e+10	3.00063e+10	3000632467427480	0.710593	3.00073e+10	10500000000	0.70906
485.14	1	6000000000000	10003001726574	9.99267e+12	6.0018e+12	1.61081e+19	5005.01	1.0003	3.0009e+10	3.0008e+10	3000803731318920	0.710591	3.0009e+10	10500000000	0.709051
484.968	1	6000000000000	1.00035e+13	9.99322e+12	6.00212e+12	1.61095e+19	5005.91	1.00035	3.00106e+10	3.00097e+10	3000968379337430	0.71059	3.00106e+10	10500000000	0.709042
484.796	1	6000000000000	1.00041e+13	9.99375e+12	6.00243e+12	1.61109e+19	5006.77	1.00041	3.00122e+10	3.00113e+10	3001126591634540	0.710588	3.00122e+10	10500000000	0.709033
484.624	1	6000000000000	1.00045e+13	9.99425e+12	6.00273e+12	1.61122e+19	5007.59	1.00046	3.00136e+10	3.00128e+10	3001278605986370	0.710586	3.00136e+10	10500000000	0.709025
484.452	1	6000000000000	1.0005e+13	9.99474e+12	6.00301e+12	1.61135e+19	5008.39	1.0005	3.00151e+10	3.00142e+10	3001424662939980	0.710585	3.00151e+10	10500000000	0.709017
484.28	1	6000000000000	1.00055e+13	9.99521e+12	6.00329e+12	1.61147e+19	5009.15	1.00055	3.00164e+10	3.00156e+10	3001564995843620	0.710583	3.00164e+10	10500000000	0.709009
484.108	1	6000000000000	1.00059e+13	9.99566e+12	6.00355e+12	1.61159e+19	5009.88	1.00059	3.00178e+10	3.0017e+10	3001699829282750	0.710581	3.00178e+10	10500000000	0.709002
483.936	1	6000000000000	10006341865222	9.99609e+12	6.00381e+12	1.6117e+19	5010.58	1.00063	3.0019e+10	3.00183e+10	3001829379080450	0.710579	3.0019e+10	10500000000	0.708994
483.764	1	6000000000000	1.00067e+13	9.9965e+12	6.00405e+12	1.61181e+19	5011.26	1.00067	3.00202e+10	3.00195e+10	3001953852579320	0.710578	3.00202e+10	10500000000	0.708987
483.592	1	6000000000000	1.00071e+13	9.9969e+12	6.00428e+12	1.61192e+19	5011.91	1.00071	3.00214e+10	3.00207e+10	3002073448965080	0.710576	3.00214e+10	10500000000	0.70898
483.42	1	6000000000000	1.00075e+13	9.99728e+12	6.00451e+12	1.61202e+19	5012.54	1.00075	3.00225e+10	3.00219e+10	3002188359587020	0.710574	3.00225e+10	10500000000	0.708973
483.248	1	6000000000000	1.00079e+13	9.99765e+12	6.00472e+12	1.61211e+19	5013.14	1.00079	3.00236e+10	3.0023e+10	3002298768267530	0.710572	3.00236e+10	10500000000	0.708967
483.076	1	6000000000000	1.00082e+13	9.998e+12	6.00493e+12	1.61221e+19	5013.71	1.00082	3.00246e+10	3.0024e+10	3002404851599600	0.710571	3.00246e+10	10500000000	0.70896
482.904	1	6000000000000	1.00085e+13	9.99834e+12	6.00513e+12	1.6123e+19	5014.27	1.00085	3.00256e+10	3.00251e+10	3002506779232510	0.710569	3.00256e+10	10500000000	0.708954
482.732	1	6000000000000	1.00089e+13	9.99867e+12	6.00532e+12	1.61238e+19	5014.8	1.00089	3.00266e+10	3.0026e+10	3002604714146140	0.710567	3.00266e+10	10500000000	0.708948
482.56	1	6000000000000	1.00092e+13	9.99898e+12	6.0055e+12	1.61246e+19	5015.31	1.00092	3.00275e+10	3.0027e+10	3002698812914400	0.710566	3.00275e+10	10500000000	0.708942
482.388	1	6000000000000	1.00095e+13	9.99929e+12	6.00568e+12	1.61254e+19	5015.8	1.00095	3.00284e+10	3.00279e+10	3002789225957990	0.710564	3.00284e+10	10500000000	0.708937
482.216	1	6000000000000	1.00098e+13	9.99957e+12	6.00585e+12	1.61262e+19	5016.27	1.00098	3.00293e+10	3.00288e+10	3002876097787360	0.710562	3.00293e+10	10500000000	0.708931
482.044	1	6000000000000	10010022394063	9.99985e+12	6.00601e+12	1.61269e+19	5016.73	1.001	3.00301e+10	3.00296e+10	3002959567235750	0.71056	3.00301e+10	10500000000	0.708926
481.872	1	6000000000000	1.00103e+13	1.00001e+13	6.00617e+12	1.61276e+19	5017.16	1.00103	3.00309e+10	3.00304e+10	3003039767683160	0.710559	3.00309e+10	10500000000	0.708921
481.7	1	6000000000000	1.00105e+13	1.00004e+13	6.00632e+12	1.61283e+19	5017.58	1.00105	3.00316e+10	3.00312e+10	3003116827271300	0.710557	3.00316e+10	10500000000	0.708916
481.528	1	6000000000000	1.00108e+13	1.00006e+13	6.00647e+12	1.61289e+19	5017.99	1.00108	3.00323e+10	3.00319e+10	3003190869110070	0.710555	3.00323e+10	10500000000	0.708911
481.356	1	6000000000000	1.0011e+13	10000860175712	6.0066e+12	1.61296e+19	5018.37	1.0011	3.0033e+10	3.00326e+10	3003262011475780	0.710554	3.0033e+10	10500000000	0.708906
481.184	1	6000000000000	1.00112e+13	1.00011e+13	6.00674e+12	1.61302e+19	5018.74	1.00112	3.00337e+10	3.00333e+10	3003330368001630	0.710552	3.00337e+10	10500000000	0.708901
481.012	1	6000000000000	1.00114e+13	1.00013e+13	6.00687e+12	1.61307e+19	5019.1	1.00114	3.00343e+10	3.0034e+10	3003396047860450	0.71055	3.00343e+10	10500000000	0.708897
480.84	1	6000000000000	1.00116e+13	1.00015e+13	6.00699e+12	1.61313e+19	5019.45	1.00117	3.00349e+10	3.00346e+10	3003459155940420	0.710548	3.00349e+10	10500000000	0.708893
480.668	1	6000000000000	1.00118e+13	1.00017e+13	6.00711e+12	1.61318e+19	5019.78	1.00118	3.00355e+10	3.00352e+10	3003519793013650	0.710547	3.00355e+10	10500000000	0.708888
480.496	1	6000000000000	1.0012e+13	1.00019e+13	6.00722e+12	1.61323e+19	5020.09	1.0012	3.00361e+10	3.00358e+10	3003578055898170	0.710545	3.00361e+10	10500000000	0.708884
480.324	1	6000000000000	1.00122e+13	1.00021e+13	6.00733e+12	1.61328e+19	5020.4	1.00122	3.00367e+10	3.00363e+10	3003634037613510	0.710543	3.00367e+10	10500000000	0.70888
480.152	1	6000000000000	1.00124e+13	1.00023e+13	6.00744e+12	1.61333e+19	5020.69	1.00124	3.00372e+10	3.00369e+10	3003687827530110	0.710542	3.00372e+10	10500000000	0.708876
479.98	1	6000000000000	1.00126e+13	10002450886063	6.00754e+12	1.61337e+19	5020.97	1.00126	3.00377e+10	3.00374e+10	3003739511512800	0.71054	3.00377e+10	10500000000	0.708872
479.808	1	6000000000000	1.00127e+13	1.00026e+13	6.00763e+12	1.61342e+19	5021.24	1.00127	3.00382e+10	3.00379e+10	3003789172058700	0.710538	3.00382e+10	10500000000	0.708868
479.636	1	6000000000000	1.00129e+13	1.00028e+13	6.00773e+12	1.61346e+19	5021.5	1.00129	3.00386e+10	3.00384e+10	3003836888429530	0.710536	3.00386e+10	10500000000	0.708865
479.464	1	6000000000000	1.0013e+13	10002928016707	6.00782e+12	1.6135e+19	5021.75	1.0013	3.00391e+10	3.00388e+10	3003882736778860	0.710535	3.00391e+10	10500000000	0.708861
479.292	1	6000000000000	1.00132e+13	1.00031e+13	6.0079e+12	1.61354e+19	5021.99	1.00132	3.00395e+10	3.00393e+10	3003926790274170	0.710533	3.00395e+10	10500000000	0.708858
479.12	1	6000000000000	1.00133e+13	1.00032e+13	6.00799e+12	1.61357e+19	5022.22	1.00133	3.00399e+10	3.00397e+10	3003969119214220	0.710531	3.00399e+10	10500000000	0.708854
478.948	1	6000000000000	1.00134e+13	1.00034e+13	6.00807e+12	1.61361e+19	5022.44	1.00134	3.00403e+10	3.00401e+10	3004009791141780	0.710529	3.00403e+10	10500000000	0.708851
478.776	1	6000000000000	10013569823131	1.00035e+13	6.00814e+12	1.61364e+19	5022.65	1.00136	3.00407e+10	3.00405e+10	3004048870951780	0.710528	3.00407e+10	10500000000	0.708847
478.604	1	6000000000000	1.00137e+13	1.00036e+13	6.00822e+12	1.61368e+19	5022.86	1.00137	3.00411e+10	3.00409e+10	3004086420995410	0.710526	3.00411e+10	10500000000	0.708844
478.432	1	6000000000000	1.00138e+13	1.00037e+13	6.00829e+12	1.61371e+19	5023.06	1.00138	3.00414e+10	3.00412e+10	3004122501179930	0.710524	3.00414e+10	10500000000	0.708841
478.26	1	6000000000000	1.00139e+13	1.00038e+13	6.00835e+12	1.61374e+19	5023.24	1.00139	3.00418e+10	3.00416e+10	3004157169064650	0.710523	3.00418e+10	10500000000	0.708838
478.088	1	5.99233e+12	1.00139e+13	1.00039e+13	6.00834e+12	1.61373e+19	5023.21	1.00139	3.00417e+10	3.00418e+10	3004181242822330	0.710521	3.00417e+10	1.04866e+10	0.708835
477.916	1	5.97829e+12	1.00131e+13	1.00035e+13	6.00785e+12	1.61351e+19	5021.82	1.00131	3.00393e+10	3.00406e+10	3004061780916450	0.710519	3.00393e+10	1.0462e+10	0.708832
477.744	1	5.96425e+12	1.00114e+13	1.00023e+13	6.00683e+12	1.61305e+19	5018.96	1.00114	3.00341e+10	3.0037e+10	3003698505405400	0.710517	3.00341e+10	1.04374e+10	0.70883
477.572	1	5.95021e+12	1.00088e+13	1.00003e+13	6.0053e+12	1.61236e+19	5014.68	1.00088	3.00265e+10	3.00308e+10	3003079178365020	0.710516	3.00265e+10	1.04129e+10	0.708827
477.4	1	5.93617e+12	1.00055e+13	9.99739e+12	6.00328e+12	1.61145e+19	5009.04	1.00054	3.00164e+10	3.00221e+10	3002209643383670	0.710514	3.00164e+10	1.03883e+10	0.708825
477.228	1	5.92213e+12	1.00013e+13	9.9937e+12	6.00078e+12	1.61033e+19	5002.09	1.00013	3.00039e+10	3.0011e+10	3001098788106540	0.710512	3.00039e+10	1.03637e+10	0.708822
477.056	1	5.90809e+12	9.99639e+12	9.98924e+12	5.99783e+12	1.60901e+19	4993.89	0.999636	2.99892e+10	2.99976e+10	2999755741474430	0.710511	2.99892e+10	1.03392e+10	0.70882
476.884	1	5.89405e+12	9.99075e+12	9.98403e+12	5.99445e+12	1.60749e+19	4984.49	0.999072	2.99722e+10	2.9982e+10	2998189364508490	0.710509	2.99722e+10	1.03146e+10	0.708818
476.712	1	5.88001e+12	9.9844e+12	9.9781e+12	5.99064e+12	1.60579e+19	4973.94	0.998437	2.99532e+10	2.99642e+10	2996408170241680	0.710507	2.99532e+10	1.029e+10	0.708817
476.54	1	5.86597e+12	9.97739e+12	9.97149e+12	5.98643e+12	1.60391e+19	4962.29	0.997735	2.99322e+10	2.99443e+10	2994420323201630	0.710505	2.99322e+10	1.02654e+10	0.708815
476.368	1	5.85193e+12	9.96972e+12	9.96421e+12	5.98183e+12	1.60185e+19	4949.59	0.996968	2.99092e+10	2.99225e+10	2992233652946530	0.710504	2.99092e+10	1.02409e+10	0.708813
476.196	1	5.83789e+12	9.96144e+12	9.9563e+12	5.97686e+12	1.59963e+19	4935.87	0.996139	2.98843e+10	2.98987e+10	2989855669433200	0.710502	2.98843e+10	1.02163e+10	0.708811
476.024	1	5.82385e+12	9.95255e+12	9.94778e+12	5.97153e+12	1.59725e+19	4921.2	0.99525	2.98576e+10	2.98731e+10	2987293577982810	0.7105	2.98576e+10	1.01917e+10	0.70881
475.852	1	5.80981e+12	9.94308e+12	9.93866e+12	5.96585e+12	1.59472e+19	4905.61	0.994304	2.98293e+10	2.98457e+10	2984554293478510	0.710499	2.98293e+10	1.01672e+10	0.708809
475.68	1	5.79576e+12	9.93306e+12	9.92898e+12	5.95984e+12	1.59204e+19	4889.14	0.993301	2.97992e+10	2.98166e+10	2981644453774490	0.710497	2.97992e+10	1.01426e+10	0.708807
475.508	1	5.78172e+12	9.92251e+12	9.91874e+12	5.9535e+12	1.58922e+19	4871.83	0.992245	2.97675e+10	2.97859e+10	2978570432357400	0.710495	2.97675e+10	1.0118e+10	0.708806
475.336	1	5.76768e+12	9.91144e+12	9.90799e+12	5.94686e+12	1.58626e+19	4853.73	0.991138	2.97343e+10	2.97535e+10	2975338350308590	0.710493	2.97343e+10	1.00934e+10	0.708805
475.164	1	5753644127428	9.89987e+12	9.89672e+12	5.93992e+12	1.58317e+19	4834.86	0.989981	2.96996e+10	2.97197e+10	2971954087613800	0.710492	2.96996e+10	1.00689e+10	0.708804
474.992	1	5.7396e+12	9.88782e+12	9.88497e+12	5.93269e+12	1.57996e+19	4815.27	0.988776	2.96635e+10	2.96844e+10	2968423293863700	0.71049	2.96635e+10	1.00443e+10	0.708802
474.82	1	5.72556e+12	9.87532e+12	9.87275e+12	5.92519e+12	1.57663e+19	4795	0.987525	2.9626e+10	2.96477e+10	2964751398385220	0.710488	2.9626e+10	1.00197e+10	0.708801
474.648	1	5.71152e+12	9.86237e+12	9.86007e+12	5.91742e+12	1.57319e+19	4774.06	0.98623	2.95871e+10	2.96096e+10	2960943619840610	0.710486	2.95871e+10	9.99517e+09	0.7088
474.476	1	5.69748e+12	9.84899e+12	9.84696e+12	5.9094e+12	1.56963e+19	4752.51	0.984892	2.9547e+10	2.95702e+10	2957004975328150	0.710485	2.9547e+10	9.9706e+09	0.708799
474.304	1	5.68344e+12	9.83521e+12	9.83343e+12	5.90112e+12	1.56597e+19	4730.36	0.983514	2.95056e+10	2.95296e+10	2952940289016280	0.710483	2.95056e+10	9.94602e+09	0.708798
474.132	1	5.6694e+12	9.82102e+12	9.81949e+12	5.89261e+12	1.5622e+19	4707.66	0.982095	2.94631e+10	2.94878e+10	2948754200339850	0.710481	2.94631e+10	9.92145e+09	0.708798
473.96	1	5.65536e+12	9.80646e+12	9.80517e+12	5.88388e+12	1.55834e+19	4684.42	0.980639	2.94194e+10	2.94447e+10	2944451171785820	0.71048	2.94194e+10	9.89688e+09	0.708797
473.788	1	5.64132e+12	9.79153e+12	9.79047e+12	5.87492e+12	1.55439e+19	4660.68	0.979145	2.93746e+10	2.94006e+10	2940035496293110	0.710478	2.93746e+10	9.87231e+09	0.708796
473.616	1	5.62728e+12	9.77624e+12	9.77541e+12	5.86575e+12	1.55035e+19	4636.47	0.977617	2.93287e+10	2.93553e+10	2935511304289940	0.710476	2.93287e+10	9.84774e+09	0.708795
473.444	1	5.61324e+12	9.76062e+12	9.75999e+12	5.85637e+12	1.54622e+19	4611.8	0.976054	2.92819e+10	2.93091e+10	2930882570390090	0.710474	2.92819e+10	9.82317e+09	0.708794
473.272	1	5.5992e+12	9.74466e+12	9.74425e+12	5.8468e+12	1.54201e+19	4586.72	0.974458	2.9234e+10	2.92618e+10	2926153119768100	0.710473	2.9234e+10	9.7986e+09	0.708794
473.1	1	5.58516e+12	9.72839e+12	9.72818e+12	5.83703e+12	1.53772e+19	4561.23	0.972831	2.91852e+10	2.92135e+10	2921326634231940	0.710471	2.91852e+10	9.77403e+09	0.708793
472.928	1	5.57112e+12	9.71181e+12	9.7118e+12	5.82709e+12	1.53335e+19	4535.37	0.971173	2.91354e+10	2.91643e+10	2916406658010580	0.710469	2.91354e+10	9.74946e+09	0.708792
472.756	1	5.55708e+12	9.69494e+12	9.69512e+12	5.81697e+12	1.52891e+19	4509.16	0.969486	2.90848e+10	2.91142e+10	2911396603272500	0.710468	2.90848e+10	9.72489e+09	0.708791
472.584	1	5.54304e+12	9.67779e+12	9.67815e+12	5.80667e+12	1.5244e+19	4482.62	0.967771	2.90334e+10	2.90633e+10	2906299755390140	0.710466	2.90334e+10	9.70032e+09	0.708791
472.412	1	5.529e+12	9.66037e+12	9.6609e+12	5.79622e+12	1.51983e+19	4455.76	0.966028	2.89811e+10	2.90115e+10	2901119277964460	0.710464	2.89811e+10	9.67575e+09	0.70879
472.24	1	5.51496e+12	9.64268e+12	9.64338e+12	5.78561e+12	1.51519e+19	4428.62	0.964259	2.8928e+10	2.89588e+10	2895858217622540	0.710462	2.8928e+10	9.65118e+09	0.708789
472.068	1	5.50092e+12	9.62473e+12	9.62561e+12	5.77484e+12	1.5105e+19	4401.21	0.962464	2.88742e+10	2.89055e+10	2890519508600690	0.710461	2.88742e+10	9.62661e+09	0.708789
471.896	1	5.48688e+12	9.60655e+12	9.60758e+12	5.76393e+12	1.50574e+19	4373.55	0.960646	2.88196e+10	2.88513e+10	2885105977124250	0.710459	2.88196e+10	9.60204e+09	0.708788
471.724	1	5.47284e+12	9.58813e+12	9.58932e+12	5.75288e+12	1.50093e+19	4345.65	0.958803	2.87644e+10	2.87965e+10	2879620345595100	0.710457	2.87644e+10	9.57747e+09	0.708787
471.552	1	5.4588e+12	9.56948e+12	9.57082e+12	5.74169e+12	1.49607e+19	4317.54	0.956939	2.87084e+10	2.87409e+10	2874065236596730	0.710456	2.87084e+10	9.5529e+09	0.708787
471.38	1	5.44476e+12	9.55061e+12	9.5521e+12	5.73037e+12	1.49116e+19	4289.22	0.955052	2.86518e+10	2.86847e+10	2868443176726320	0.710454	2.86518e+10	9.52833e+09	0.708786
471.208	1	5.43072e+12	9.53154e+12	9.53317e+12	5.71892e+12	1.48619e+19	4260.73	0.953144	2.85946e+10	2.86279e+10	2862756600262810	0.710452	2.85946e+10	9.50376e+09	0.708786
471.036	1	5.41668e+12	9.51226e+12	9.51403e+12	5.70735e+12	1.48119e+19	4232.06	0.951216	2.85368e+10	2.85704e+10	2857007852679030	0.71045	2.85368e+10	9.47919e+09	0.708785
470.864	1	5.40264e+12	9.49278e+12	9.49469e+12	5.69567e+12	1.47613e+19	4203.25	0.949268	2.84783e+10	2.85123e+10	2851199194005900	0.710449	2.84783e+10	9.45461e+09	0.708784
470.692	1	5.3886e+12	9.47312e+12	9.47515e+12	5.68387e+12	1.47104e+19	4174.29	0.947302	2.84194e+10	2.84536e+10	2845332802055900	0.710447	2.84194e+10	9.43004e+09	0.708784
470.52	1	5.37456e+12	9.45327e+12	9.45544e+12	5.67196e+12	1.46591e+19	4145.21	0.945317	2.83598e+10	2.83944e+10	2839410775512740	0.710445	2.83598e+10	9.40547e+09	0.708783
470.348	1	5.36052e+12	9.43325e+12	9.43554e+12	5.65995e+12	1.46074e+19	4116.02	0.943315	2.82998e+10	2.83347e+10	2833435136893760	0.710443	2.82998e+10	9.3809e+09	0.708783
470.176	1	5.34648e+12	9.41306e+12	9.41547e+12	5.64784e+12	1.45553e+19	4086.73	0.941296	2.82392e+10	2.82744e+10	2827407835391110	0.710442	2.82392e+10	9.35633e+09	0.708782
470.004	1	5.33244e+12	9.39271e+12	9.39523e+12	5.63563e+12	1.45029e+19	4057.35	0.939261	2.81781e+10	2.82136e+10	2821330749597510	0.71044	2.81781e+10	9.33176e+09	0.708781
469.832	1	5.3184e+12	9.37221e+12	9.37484e+12	5.62332e+12	1.44501e+19	4027.89	0.93721	2.81166e+10	2.81524e+10	2815205690122030	0.710438	2.81166e+10	9.30719e+09	0.708781
469.66	1	5.30436e+12	9.35155e+12	9.35429e+12	5.61093e+12	1.43971e+19	3998.37	0.935144	2.80546e+10	2.80907e+10	2809034402101020	0.710437	2.80546e+10	9.28262e+09	0.70878
469.488	1	5.29031e+12	9.33074e+12	9.33359e+12	5.59845e+12	1.43437e+19	3968.79	0.933064	2.79922e+10	2.80285e+10	2802818567609000	0.710435	2.79922e+10	9.25805e+09	0.708779
469.316	1	5.27627e+12	9.3098e+12	9.31275e+12	5.58588e+12	1.42901e+19	3939.18	0.93097	2.79294e+10	2.79659e+10	2796559807974160	0.710433	2.79294e+10	9.23348e+09	0.708779
469.144	1	5.26223e+12	9.28872e+12	9.29178e+12	5.57323e+12	1.42362e+19	3909.52	0.928862	2.78662e+10	2.79029e+10	2790259686002680	0.710431	2.78662e+10	9.20891e+09	0.708778
468.972	1	5.24819e+12	9.26751e+12	9.27066e+12	5.56051e+12	1.41821e+19	3879.84	0.926741	2.78025e+10	2.78395e+10	2783919708116130	0.71043	2.78025e+10	9.18434e+09	0.708778
468.8	1	5.23415e+12	9.24618e+12	9.24943e+12	5547708161006	1.41277e+19	3850.15	0.924607	2.77385e+10	2.77757e+10	2777541326405690	0.710428	2.77385e+10	9.15977e+09	0.708777
468.628	1	5.22011e+12	9.22473e+12	9.22806e+12	5.53484e+12	1.40731e+19	3820.45	0.922462	2.76742e+10	2.77116e+10	2771125940606880	0.710426	2.76742e+10	9.1352e+09	0.708776
468.456	1	5220000000000	9.20361e+12	9.20675e+12	5.52216e+12	1.40195e+19	3791.38	0.92035	2.76108e+10	2.76476e+10	2764727324281180	0.710425	2.76108e+10	9135000000	0.708776
468.284	1	5220000000000	9.18332e+12	9.18605e+12	5.50999e+12	1.3968e+19	3763.61	0.918322	2.755e+10	2.75854e+10	2758512237536610	0.710423	2.755e+10	9135000000	0.708775
468.112	1	5.21924e+12	9.16384e+12	9.16613e+12	5.4983e+12	1.39187e+19	3737.07	0.916374	2.74915e+10	2.75256e+10	2752531508881130	0.710421	2.74915e+10	9.13366e+09	0.708774
467.94	1	5.2176e+12	9.14504e+12	9.14694e+12	5.48702e+12	1.38712e+19	3711.59	0.914495	2.74351e+10	2.7468e+10	2746772165254440	0.710419	2.74351e+10	9.13079e+09	0.708773
467.768	1	5215957905365	9.12689e+12	9.12842e+12	5.47613e+12	1.38253e+19	3687.09	0.91268	2.73807e+10	2.74124e+10	2741213608470520	0.710418	2.73807e+10	9.12793e+09	0.708772
467.596	1	5.21432e+12	9.10935e+12	9.11054e+12	5.46561e+12	1.37811e+19	3663.54	0.910926	2.73281e+10	2.73587e+10	2735845589879750	0.710416	2.73281e+10	9.12506e+09	0.708771
467.424	1	5.21268e+12	9.09241e+12	9.09327e+12	5.45545e+12	1.37385e+19	3640.89	0.909233	2.72772e+10	2.73069e+10	2730660404495600	0.710414	2.72772e+10	9.12219e+09	0.708769
467.252	1	5.21104e+12	9.07604e+12	9.07658e+12	5.44563e+12	1.36973e+19	3619.09	0.907596	2.72281e+10	2.72568e+10	2725651018507760	0.710413	2.72281e+10	9.11932e+09	0.708768
467.08	1	5.2094e+12	9.06023e+12	9.06046e+12	5.43614e+12	1.36575e+19	3598.12	0.906015	2.71807e+10	2.72083e+10	2720810712174620	0.710411	2.71807e+10	9.11646e+09	0.708767
466.908	1	5.20776e+12	9.04494e+12	9.04488e+12	5.42697e+12	1.36192e+19	3577.93	0.904487	2.71348e+10	2.71616e+10	2716133008078580	0.710409	2.71348e+10	9.11359e+09	0.708765
466.736	1	5.20613e+12	9.03017e+12	9.02981e+12	5.4181e+12	1.35821e+19	3558.49	0.903009	2.70905e+10	2.71163e+10	2711611653097330	0.710407	2.70905e+10	9.11072e+09	0.708764
466.564	1	5.20449e+12	9.01588e+12	9.01525e+12	5.40953e+12	1.35464e+19	3539.76	0.901581	2.70476e+10	2.70726e+10	2707240610472000	0.710406	2.70476e+10	9.10785e+09	0.708762
466.392	1	5.20285e+12	9.00206e+12	9.00118e+12	5.40124e+12	1.35118e+19	3521.72	0.900199	2.70062e+10	2.70303e+10	2703014053768120	0.710404	2.70062e+10	9.10499e+09	0.708761
466.22	1	5.20121e+12	8.9887e+12	8.98756e+12	5.39322e+12	1.34784e+19	3504.33	0.898863	2.69661e+10	2.69895e+10	2698926361195920	0.710402	2.69661e+10	9.10212e+09	0.708759
466.048	1	5.19957e+12	8.97577e+12	8.97439e+12	5.38546e+12	1.34461e+19	3487.56	0.89757	2.69273e+10	2.69499e+10	2694972110012200	0.7104	2.69273e+10	9.09925e+09	0.708758
465.876	1	5.19793e+12	8.96326e+12	8.96164e+12	5.37795e+12	1.34149e+19	3471.39	0.896319	2.68898e+10	2.69116e+10	2691146070961200	0.7104	2.68898e+10	9.09638e+09	0.708756
465.704	1	5.19629e+12	8.95115e+12	8.94931e+12	5.37069e+12	1.33847e+19	3455.78	0.895109	2.68534e+10	2.68746e+10	2687443202756030	0.7104	2.68534e+10	9.09351e+09	0.708754
465.532	1	5.19466e+12	8.93942e+12	8.93737e+12	5.36365e+12	1.33555e+19	3440.72	0.893936	2.68183e+10	2.68388e+10	2683858646609040	0.7104	2.68183e+10	9.09065e+09	0.708753
465.36	1	5.19302e+12	8.92806e+12	8.9258e+12	5.35684e+12	1.33273e+19	3426.17	0.892801	2.67842e+10	2.6804e+10	2680387720820230	0.7104	2.67842e+10	9.08778e+09	0.708751
465.188	1	5.19138e+12	8.91706e+12	8.91461e+12	5.35024e+12	1.32999e+19	3412.13	0.891701	2.67512e+10	2.67704e+10	2677025915432210	0.7104	2.67512e+10	9.08491e+09	0.70875
465.016	1	5.18974e+12	8.9064e+12	8.90376e+12	5.34384e+12	1.32734e+19	3398.55	0.890635	2.67192e+10	2.67378e+10	2673768886959270	0.7104	2.67192e+10	9.08204e+09	0.708748
464.844	1	5.1881e+12	8.89607e+12	8.89324e+12	5.33764e+12	1.32478e+19	3385.43	0.889602	2.66882e+10	2.67063e+10	2670612453197160	0.7104	2.66882e+10	9.07918e+09	0.708747
464.672	1	5.18646e+12	8.88605e+12	8.88305e+12	5.33163e+12	1.3223e+19	3372.75	0.8886	2.66582e+10	2.66757e+10	2667552588119620	0.7104	2.66582e+10	9.07631e+09	0.708745
464.5	1	5.18482e+12	8.87634e+12	8.87317e+12	5.3258e+12	1.31989e+19	3360.47	0.887629	2.6629e+10	2.6646e+10	2664585416866650	0.7104	2.6629e+10	9.07344e+09	0.708744
464.328	1	5.18318e+12	8.86691e+12	8.86358e+12	5.32015e+12	1.31755e+19	3348.6	0.886686	2.66007e+10	2.66172e+10	2661707210829010	0.7104	2.66007e+10	9.07057e+09	0.708742
464.156	1	5.18155e+12	8.85776e+12	8.85428e+12	5.31466e+12	1.31529e+19	3337.1	0.885772	2.65733e+10	2.65893e+10	2658914382832640	0.7104	2.65733e+10	9.06771e+09	0.708741
463.984	1	5.17991e+12	8.84888e+12	8.84525e+12	5.30933e+12	1.31309e+19	3325.96	0.884884	2.65466e+10	2.65622e+10	2656203482426160	0.7104	2.65466e+10	9.06484e+09	0.708739
463.812	1	5.17827e+12	8.84025e+12	8.83648e+12	5.30415e+12	1.31096e+19	3315.17	0.884021	2.65208e+10	2.65358e+10	2653571191273940	0.7104	2.65208e+10	9.06197e+09	0.708738
463.64	1	5.17663e+12	8.83187e+12	8.82796e+12	5.29912e+12	1.30889e+19	3304.7	0.883183	2.64956e+10	2.65103e+10	2651014318656800	0.7104	2.64956e+10	9.0591e+09	0.708736
463.468	1.00199	5.17499e+12	8.84083e+12	8.82179e+12	5.3045e+12	1.30689e+19	3294.6	0.882372	2.65225e+10	2.64921e+10	2649236830180990	0.710388	2.65225e+10	9.05624e+09	0.708735
463.296	1.01274	5.17335e+12	8.92756e+12	8.87505e+12	5.35653e+12	1.3049e+19	3284.57	0.881566	2.67827e+10	2.66529e+10	2665403629396450	0.710324	2.67827e+10	9.05337e+09	0.708733
463.124	1.02349	5.17171e+12	9.01144e+12	8.9545e+12	5.40686e+12	1.30225e+19	3271.3	0.880498	2.70343e+10	2.68916e+10	2689285921174380	0.71026	2.70343e+10	9.0505e+09	0.70873
462.952	1.03425	5.17008e+12	9.09148e+12	9.03558e+12	5.45489e+12	1.29876e+19	3253.76	0.879081	2.72744e+10	2.71351e+10	2713627835501010	0.710198	2.72744e+10	9.04763e+09	0.708725
462.78	1.045	5.16844e+12	9.16753e+12	9.11368e+12	5.50052e+12	1.29439e+19	3231.96	0.877311	2.75026e+10	2.73696e+10	2737071196424870	0.710138	2.75026e+10	9.04476e+09	0.70872
462.608	1.05575	5.1668e+12	9.23961e+12	9.18798e+12	5.54377e+12	1.2892e+19	3206.11	0.875201	2.77188e+10	2.75926e+10	2759371252585550	0.710078	2.77188e+10	9.0419e+09	0.708714
462.436	1.06651	5.16516e+12	9.30776e+12	9.25836e+12	5.58466e+12	1.28322e+19	3176.44	0.872766	2.79233e+10	2.78039e+10	2780494161082420	0.71002	2.79233e+10	9.03903e+09	0.708706
462.264	1.07726	5.16352e+12	9.37204e+12	9.32484e+12	5.62322e+12	1.27649e+19	3143.22	0.870019	2.81161e+10	2.80035e+10	2800446599627160	0.709963	2.81161e+10	9.03616e+09	0.708698
462.092	1.08801	5.16188e+12	9.43249e+12	9.38747e+12	5.65949e+12	1.26904e+19	3106.69	0.866975	2.82975e+10	2.81915e+10	2819243577799000	0.709907	2.82975e+10	9.03329e+09	0.708689
461.92	1.09876	5.16024e+12	9.48918e+12	9.44632e+12	5.69351e+12	1.26093e+19	3067.12	0.863649	2.84675e+10	2.83682e+10	2836902354666670	0.709852	2.84675e+10	9.03043e+09	0.708679
461.748	1.10952	5.15861e+12	9.54218e+12	9.50143e+12	5.72531e+12	1.25219e+19	3024.76	0.860054	2.86265e+10	2.85336e+10	2853441289290340	0.709798	2.86265e+10	9.02756e+09	0.708668
461.576	1.12027	5.15697e+12	9.59154e+12	9.55287e+12	5.75493e+12	1.24286e+19	2979.84	0.856204	2.87746e+10	2.86881e+10	2868879621191360	0.709745	2.87746e+10	9.02469e+09	0.708656
461.404	1.13102	5.15533e+12	9.63735e+12	9.60072e+12	5.78241e+12	1.23297e+19	2932.62	0.852112	2.8912e+10	2.88317e+10	2883237423472900	0.709694	2.8912e+10	9.02182e+09	0.708644
461.232	1.14177	5.15369e+12	9.67966e+12	9.64504e+12	5.8078e+12	1.22256e+19	2883.34	0.847791	2.9039e+10	2.89647e+10	2896535585298000	0.709643	2.9039e+10	9.01896e+09	0.70863
461.06	1.15253	5.15205e+12	9.71855e+12	9.6859e+12	5.83113e+12	1.21167e+19	2832.22	0.843255	2.91557e+10	2.90874e+10	2908795796690370	0.709593	2.91557e+10	9.01609e+09	0.708616
460.887	1.16328	5.15041e+12	9.75411e+12	9.72338e+12	5.85246e+12	1.20033e+19	2779.49	0.838515	2.92623e+10	2.91999e+10	2920040530645350	0.709544	2.92623e+10	9.01322e+09	0.708602
460.715	1.17403	5.14877e+12	9.7864e+12	9.75755e+12	5.87184e+12	1.18859e+19	2725.37	0.833585	2.93592e+10	2.93024e+10	2930293021706040	0.709496	2.93592e+10	9.01035e+09	0.708586
460.543	1.18478	5.14713e+12	9.81551e+12	9.7885e+12	5.88931e+12	1.17647e+19	2670.07	0.828475	2.94465e+10	2.93953e+10	2939577240943340	0.709449	2.94465e+10	9.00749e+09	0.70857
460.371	1.19554	5.1455e+12	9.84152e+12	9.8163e+12	5.90491e+12	1.164e+19	2613.79	0.823198	2.95246e+10	2.94788e+10	2947917867423170	0.709403	2.95246e+10	9.00462e+09	0.708554
460.199	1.20629	5.14386e+12	9.86452e+12	9.84105e+12	5.91871e+12	1.15122e+19	2556.73	0.817766	2.95936e+10	2.95531e+10	2955340256269410	0.709357	2.95936e+10	9.00175e+09	0.708536
460.027	1.21704	5.14222e+12	9.8846e+12	9.86283e+12	5.93076e+12	1.13816e+19	2499.07	0.81219	2.96538e+10	2.96184e+10	2961870403436990	0.709312	2.96538e+10	8.99888e+09	0.708519
459.855	1.2278	5.14058e+12	9.90185e+12	9.88172e+12	5.94111e+12	1.12486e+19	2440.98	0.80648	2.97055e+10	2.96751e+10	2967534907312980	0.709268	2.97055e+10	8.99601e+09	0.7085
459.683	1.23855	5.13894e+12	9.91635e+12	9.89781e+12	5.94981e+12	1.11133e+19	2382.63	0.800648	2.97491e+10	2.97234e+10	2972360927269000	0.709225	2.97491e+10	8.99315e+09	0.708482
459.511	1.2493	5.1373e+12	9.9282e+12	9.91121e+12	5.95692e+12	1.09761e+19	2324.17	0.794705	2.97846e+10	2.97636e+10	2976376139296270	0.709183	2.97846e+10	8.99028e+09	0.708462
459.339	1.25	5.13566e+12	9.85849e+12	9.88287e+12	5.9151e+12	1.0837e+19	2265.66	0.788649	2.95755e+10	2.96774e+10	2967653075694260	0.70918	2.95755e+10	8.98741e+09	0.708443
459.167	1.25	5.13403e+12	9.78436e+12	9.81619e+12	5.87061e+12	1.07016e+19	2209.38	0.78272	2.93531e+10	2.9477e+10	2947591933319720	0.70918	2.93531e+10	8.98454e+09	0.708425
458.995	1.25	5.13239e+12	9.71356e+12	9.74511e+12	5.82814e+12	1.05729e+19	2156.56	0.777057	2.91407e+10	2.92635e+10	2926247203243540	0.70918	2.91407e+10	8.98168e+09	0.708406
458.823	1.25	5.13075e+12	9.64632e+12	9.67616e+12	5.78779e+12	1.04513e+19	2107.22	0.771679	2.8939e+10	2.90565e+10	2905550006792520	0.70918	2.8939e+10	8.97881e+09	0.708389
458.651	1.25	5.12911e+12	9.58255e+12	9.61047e+12	5.74953e+12	1.03365e+19	2061.17	0.766579	2.87477e+10	2.88593e+10	2885834853896790	0.70918	2.87477e+10	8.97594e+09	0.708372
458.479	1.25	5.12747e+12	9.52211e+12	9.54814e+12	5.71326e+12	1.02282e+19	2018.17	0.761745	2.85663e+10	2.86722e+10	2867127744493210	0.70918	2.85663e+10	8.97307e+09	0.708355
458.307	1.25	5.12583e+12	9.46483e+12	9.48906e+12	5.6789e+12	1.01259e+19	1978.01	0.757164	2.83945e+10	2.84948e+10	2849395889407790	0.70918	2.83945e+10	8.97021e+09	0.708339
458.135	1.25	5.12419e+12	9.41058e+12	9.43309e+12	5.64635e+12	1.00294e+19	1940.49	0.752825	2.82317e+10	2.83268e+10	2832596182391120	0.70918	2.82317e+10	8.96734e+09	0.708323
457.963	1.25	5.12255e+12	9.35921e+12	9.38008e+12	5.61552e+12	9.9384e+18	1905.42	0.748717	2.80776e+10	2.81676e+10	2816684639920120	0.70918	2.80776e+10	8.96447e+09	0.708307
457.791	1.25	5.12092e+12	9.31057e+12	9.32988e+12	5.58634e+12	9.85253e+18	1872.62	0.744827	2.79317e+10	2.80169e+10	2801618260453660	0.70918	2.79317e+10	8.9616e+09	0.708292
457.619	1.25	5.11928e+12	9.26453e+12	9.28236e+12	5.55872e+12	9.77153e+18	1841.95	0.741145	2.77936e+10	2.78742e+10	2787355404851680	0.70918	2.77936e+10	8.95874e+09	0.708278
457.447	1.25	5.11764e+12	9.22096e+12	9.23738e+12	5.53258e+12	9.69512e+18	1813.25	0.73766	2.76629e+10	2.77392e+10	2773855882691260	0.70918	2.76629e+10	8.95587e+09	0.708263
457.275	1.25	5.116e+12	9179734451148	9.19481e+12	5.50784e+12	9.62303e+18	1786.38	0.734363	2.75392e+10	2.76114e+10	2761080975022380	0.70918	2.75392e+10	8.953e+09	0.708249
457.103	1.25	5.11436e+12	9.14073e+12	9.15454e+12	5.48444e+12	9.55503e+18	1761.22	0.731243	2.74222e+10	2.74905e+10	2748993438857390	0.70918	2.74222e+10	8.95013e+09	0.708236
456.931	1.25	5.11272e+12	9.10383e+12	9.11644e+12	5.4623e+12	9.49088e+18	1737.64	0.728292	2.73115e+10	2.73761e+10	2737557502714650	0.70918	2.73115e+10	8.94726e+09	0.708223
456.759	1.25	5.11108e+12	9.06892e+12	9.08039e+12	5.44135e+12	9.43035e+18	1715.54	0.7255	2.72068e+10	2.72679e+10	2726738855549210	0.70918	2.72068e+10	8.9444e+09	0.70821
456.587	1.25	5.10945e+12	9.0359e+12	9.04629e+12	5.42154e+12	9.37323e+18	1694.82	0.722859	2.71077e+10	2.71655e+10	2716504630040280	0.70918	2.71077e+10	8.94153e+09	0.708197
456.415	1.25	5.10781e+12	9.00466e+12	9.01404e+12	5.4028e+12	9.31933e+18	1675.37	0.720361	2.7014e+10	2.70687e+10	2706823380929590	0.70918	2.7014e+10	8.93866e+09	0.708185
456.243	1.25	5.10617e+12	8.97511e+12	8.98352e+12	5.38506e+12	9.26845e+18	1657.13	0.717997	2.69253e+10	2.69771e+10	2697665059034230	0.70918	2.69253e+10	8.93579e+09	0.708173
456.071	1.25	5.10453e+12	8.94715e+12	8.95465e+12	5.36829e+12	9.22042e+18	1639.99	0.715761	2.68414e+10	2.68904e+10	2689000981523220	0.70918	2.68414e+10	8.93293e+09	0.708162
455.899	1.25	5.10289e+12	8.9207e+12	8.92734e+12	5.35242e+12	9.17507e+18	1623.89	0.713645	2.67621e+10	2.68084e+10	2680803799015520	0.70918	2.67621e+10	8.93006e+09	0.708151
455.727	1.25	5.10125e+12	8.89567e+12	8.9015e+12	5.3374e+12	9.13223e+18	1608.76	0.711644	2.6687e+10	2.67309e+10	2673047460024330	0.70918	2.6687e+10	8.92719e+09	0.70814
455.555	1.25	5.09961e+12	8.87197e+12	8.87704e+12	5.32318e+12	9.09176e+18	1594.53	0.709749	2.66159e+10	2.66574e+10	2665707173236730	0.70918	2.66159e+10	8.92432e+09	0.708129
455.383	1.25	5.09797e+12	8.84955e+12	8.85389e+12	5.30973e+12	9.05352e+18	1581.14	0.707955	2.65486e+10	2.65879e+10	2658759368081530	0.70918	2.65486e+10	8.92146e+09	0.708119
455.211	1.25	5.09634e+12	8.82831e+12	8.83198e+12	5.29699e+12	9.01737e+18	1568.54	0.706257	2.64849e+10	2.65221e+10	2652181654000190	0.70918	2.64849e+10	8.91859e+09	0.708109
455.039	1.25	5.0947e+12	8.8082e+12	8.81122e+12	5.28492e+12	8.98318e+18	1556.66	0.704648	2.64246e+10	2.64598e+10	2645952778798490	0.70918	2.64246e+10	8.91572e+09	0.708099
454.867	1.25	5.09306e+12	8.78914e+12	8.79157e+12	5.27349e+12	8.95084e+18	1545.47	0.703124	2.63674e+10	2.64008e+10	2640052586419840	0.70918	2.63674e+10	8.91285e+09	0.708089
454.695	1.25	5.09142e+12	8.77109e+12	8.77294e+12	5.26265e+12	8.92024e+18	1534.92	0.70168	2.63133e+10	2.63449e+10	2634461974445040	0.70918	2.63133e+10	8.90999e+09	0.70808
454.523	1.25	5.08978e+12	8.75397e+12	8.75528e+12	5.25238e+12	8.89126e+18	1524.96	0.700311	2.62619e+10	2.62919e+10	2629162851589260	0.70918	2.62619e+10	8.90712e+09	0.708071
454.351	1.25	5.08814e+12	8.73773e+12	8.73854e+12	5.24264e+12	8.86381e+18	1515.56	0.699012	2.62132e+10	2.62416e+10	2624138095433900	0.70918	2.62132e+10	8.90425e+09	0.708062
454.179	1.25	5.0865e+12	8.72232e+12	8.72266e+12	5.23339e+12	8.83779e+18	1506.67	0.69778	2.6167e+10	2.61939e+10	2619371510600760	0.70918	2.6167e+10	8.90138e+09	0.708054
454.007	1.25	5.08487e+12	8.70769e+12	8.70759e+12	5.22462e+12	8.81313e+18	1498.27	0.69661	2.61231e+10	2.61487e+10	2614847787546860	0.70918	2.61231e+10	8.89851e+09	0.708045
453.835	1.25	5.08323e+12	8.6938e+12	8.69328e+12	5.21628e+12	8.78972e+18	1490.32	0.695499	2.60814e+10	2.61057e+10	2610552462131710	0.70918	2.60814e+10	8.89565e+09	0.708037
453.663	1.25	5.08159e+12	8.6806e+12	8.67968e+12	5.20836e+12	8.7675e+18	1482.79	0.694443	2.60418e+10	2.60649e+10	2606471876084650	0.70918	2.60418e+10	8.89278e+09	0.708029
453.491	1.25	5.07995e+12	8.66805e+12	8.66676e+12	5.20083e+12	8.7464e+18	1475.66	0.693439	2.60041e+10	2.60261e+10	2602593138477280	0.70918	2.60041e+10	8.88991e+09	0.708022
453.319	1.25	5.07831e+12	8.6561e+12	8.65447e+12	5.19366e+12	8.72633e+18	1468.9	0.692483	2.59683e+10	2.59892e+10	2598904088285940	0.70918	2.59683e+10	8.88704e+09	0.708014
453.147	1.25	5.07667e+12	8.64473e+12	8.64277e+12	5.18684e+12	8.70725e+18	1462.48	0.691574	2.59342e+10	2.59541e+10	2595393258111080	0.70918	2.59342e+10	8.88418e+09	0.708007
452.975	1.25	5.07503e+12	8.6339e+12	8.63163e+12	5.18034e+12	8.68908e+18	1456.38	0.690708	2.59017e+10	2.59207e+10	2592049839103850	0.70918	2.59017e+10	8.88131e+09	0.708
452.803	1.25	5.0734e+12	8.62357e+12	8.62102e+12	5.17414e+12	8.67178e+18	1450.59	0.689882	2.58707e+10	2.58888e+10	2588863647136130	0.70918	2.58707e+10	8.87844e+09	0.707993
452.631	1.25	5.07176e+12	8.61372e+12	8.6109e+12	5.16823e+12	8.65528e+18	1445.07	0.689093	2.58411e+10	2.58584e+10	2585825090237050	0.70918	2.58411e+10	8.87557e+09	0.707987
452.459	1.25	5.07012e+12	8.60431e+12	8.60124e+12	5.16258e+12	8.63954e+18	1439.82	0.688341	2.58129e+10	2.58294e+10	2582925137308410	0.70918	2.58129e+10	8.87271e+09	0.70798
452.287	1.25	5.06848e+12	8.59532e+12	8.59201e+12	5.15719e+12	8.62451e+18	1434.81	0.687622	2.57859e+10	2.58017e+10	2580155288121110	0.70918	2.57859e+10	8.86984e+09	0.707974
452.115	1.25	5.06684e+12	8.58672e+12	8.58319e+12	5.15203e+12	8.61015e+18	1430.03	0.686934	2.57602e+10	2.57752e+10	2577507544586910	0.70918	2.57602e+10	8.86697e+09	0.707968
451.943	1.25	5.0652e+12	8.57849e+12	8.57475e+12	5.14709e+12	8.5964e+18	1425.47	0.686276	2.57355e+10	2.57499e+10	2574974383292280	0.70918	2.57355e+10	8.8641e+09	0.707962
451.771	1.25	5.06356e+12	8.5706e+12	8.56667e+12	5.14236e+12	8.58325e+18	1421.11	0.685645	2.57118e+10	2.57256e+10	2572548729275330	0.70918	2.57118e+10	8.86124e+09	0.707956
451.599	1.25	5.06192e+12	8.56304e+12	8.55892e+12	5.13782e+12	8.57064e+18	1416.94	0.68504	2.56891e+10	2.57024e+10	2570223931021630	0.70918	2.56891e+10	8.85837e+09	0.707951
451.427	1.25	5.06029e+12	8.55578e+12	8.55149e+12	5.13347e+12	8.55854e+18	1412.94	0.68446	2.56673e+10	2.568e+10	2567993736650580	0.70918	2.56673e+10	8.8555e+09	0.707945
451.255	1.25	5.05865e+12	8.54881e+12	8.54436e+12	5.12929e+12	8.54692e+18	1409.11	0.683902	2.56464e+10	2.56586e+10	2565852271260830	0.70918	2.56464e+10	8.85263e+09	0.70794
451.083	1.25	5.05701e+12	8.5421e+12	8.5375e+12	5.12526e+12	8.53576e+18	1405.43	0.683366	2.56263e+10	2.5638e+10	2563794015400430	0.70918	2.56263e+10	8.84976e+09	0.707935
450.911	1.25	5.05537e+12	8.53565e+12	8.5309e+12	5.12139e+12	8.52502e+18	1401.89	0.682849	2.56069e+10	2.56182e+10	2561813784625250	0.70918	2.56069e+10	8.8469e+09	0.70793
450.739	1.25	5.05373e+12	8.52943e+12	8.52455e+12	5.11766e+12	8.51467e+18	1398.49	0.682352	2.55883e+10	2.55992e+10	2559906710108230	0.70918	2.55883e+10	8.84403e+09	0.707925
450.567	1.25	5.05209e+12	8.52343e+12	8.51843e+12	5.11406e+12	8.50469e+18	1395.21	0.681872	2.55703e+10	2.55808e+10	2558068220260410	0.70918	2.55703e+10	8.84116e+09	0.70792
450.395	1.25	5.05045e+12	8.51763e+12	8.51252e+12	5.11058e+12	8.49506e+18	1392.05	0.681408	2.55529e+10	2.5563e+10	2556294023324450	0.70918	2.55529e+10	8.83829e+09	0.707916
450.223	1.25	5.04882e+12	8.51203e+12	8.50681e+12	5.10722e+12	8.48576e+18	1389.01	0.68096	2.55361e+10	2.55459e+10	2554580090901210	0.70918	2.55361e+10	8.83543e+09	0.707911
450.051	1.25	5.04718e+12	8.50661e+12	8.50129e+12	5.10397e+12	8.47676e+18	1386.06	0.680527	2.55198e+10	2.55293e+10	2552922642369520	0.70918	2.55198e+10	8.83256e+09	0.707907
449.879	1.25	5.04554e+12	8.50136e+12	8.49594e+12	5.10082e+12	8.46805e+18	1383.21	0.680107	2.55041e+10	2.55133e+10	2551318130160370	0.70918	2.55041e+10	8.82969e+09	0.707903
449.707	1.25	5.0439e+12	8.49627e+12	8.49076e+12	5.09776e+12	8.4596e+18	1380.46	0.6797	2.54888e+10	2.54977e+10	2549763225846390	0.70918	2.54888e+10	8.82682e+09	0.707899
449.535	1.25	5.04226e+12	8.49133e+12	8.48574e+12	5.0948e+12	8.45141e+18	1377.78	0.679304	2.5474e+10	2.54826e+10	2548254807008920	0.70918	2.5474e+10	8.82396e+09	0.707895
449.363	1.25	5.04062e+12	8.48653e+12	8.48086e+12	5.09192e+12	8.44345e+18	1375.19	0.67892	2.54596e+10	2.5468e+10	2546789944845580	0.70918	2.54596e+10	8.82109e+09	0.707891
449.191	1.25	5.03898e+12	8.48185e+12	8.47612e+12	5.08911e+12	8.4357e+18	1372.67	0.678547	2.54456e+10	2.54537e+10	2545365892481930	0.70918	2.54456e+10	8.81822e+09	0.707887
449.019	1.25	5.03734e+12	8.47731e+12	8.4715e+12	5.08638e+12	8.42817e+18	1370.21	0.678183	2.54319e+10	2.54399e+10	2543980073952390	0.70918	2.54319e+10	8.81535e+09	0.707884
448.847	1.25	5.03571e+12	8.47287e+12	8.467e+12	5.08372e+12	8.42083e+18	1367.83	0.677828	2.54186e+10	2.54264e+10	2542630073816320	0.70918	2.54186e+10	8.81249e+09	0.70788
448.675	1.25	5.03407e+12	8.46855e+12	8.46262e+12	5.08113e+12	8.41367e+18	1365.5	0.677482	2.54056e+10	2.54132e+10	2541313627376560	0.70918	2.54056e+10	8.80962e+09	0.707877
448.503	1.25	5.03243e+12	8.46432e+12	8.45834e+12	5.07859e+12	8.40667e+18	1363.23	0.677144	2.5393e+10	2.54003e+10	2540028611468750	0.70918	2.5393e+10	8.80675e+09	0.707873
448.331	1.25	5.03079e+12	8.46019e+12	8.45416e+12	5.07612e+12	8.39984e+18	1361.02	0.676814	2.53806e+10	2.53878e+10	2538773035791230	0.70918	2.53806e+10	8.80388e+09	0.70787
448.159	1.25	5.02915e+12	8.45615e+12	8.45007e+12	5.07369e+12	8.39315e+18	1358.85	0.67649	2.53684e+10	2.53755e+10	2537545034746310	0.70918	2.53684e+10	8.80101e+09	0.707867
447.987	1.25	5.02751e+12	8.45219e+12	8.44606e+12	5.07131e+12	8.38661e+18	1356.73	0.676174	2.53566e+10	2.53635e+10	2536342859765150	0.70918	2.53566e+10	8.79815e+09	0.707864
447.815	1.25	5.02587e+12	8.44831e+12	8.44214e+12	5.06899e+12	8.38019e+18	1354.66	0.675863	2.53449e+10	2.53517e+10	2535164872089610	0.70918	2.53449e+10	8.79528e+09	0.707861
447.643	1.25	5.02424e+12	8.4445e+12	8.43829e+12	5.0667e+12	8.3739e+18	1352.62	0.675558	2.53335e+10	2.53402e+10	2534009535985640	0.70918	2.53335e+10	8.79241e+09	0.707858
447.471	1.25	5.0226e+12	8.44076e+12	8.43451e+12	5.06446e+12	8.36772e+18	1350.63	0.675259	2.53223e+10	2.53288e+10	2532875412363980	0.70918	2.53223e+10	8.78954e+09	0.707856
447.299	1.25	5.02096e+12	8.43708e+12	8.4308e+12	5.06225e+12	8.36164e+18	1348.67	0.674965	2.53112e+10	2.53177e+10	2531761152785240	0.70918	2.53112e+10	8.78668e+09	0.707853
447.127	1.25	5.01932e+12	8.43346e+12	8.42715e+12	5.06008e+12	8.35567e+18	1346.74	0.674676	2.53004e+10	2.53067e+10	2530665493827310	0.70918	2.53004e+10	8.78381e+09	0.70785
446.955	1.25	5.01768e+12	8.4299e+12	8.42356e+12	5.05794e+12	8.34979e+18	1344.85	0.674391	2.52897e+10	2.52959e+10	2529587251794390	0.70918	2.52897e+10	8.78094e+09	0.707848
446.783	1.25	5.01604e+12	8.42639e+12	8.42002e+12	5.05584e+12	8.344e+18	1342.98	0.67411	2.52792e+10	2.52853e+10	2528525317747790	0.70918	2.52792e+10	8.77807e+09	0.707845
446.611	1.25	5.0144e+12	8.42293e+12	8.41654e+12	5.05376e+12	8.33829e+18	1341.14	0.673833	2.52688e+10	2.52748e+10	2527478652839900	0.70918	2.52688e+10	8.77521e+09	0.707843
446.439	1.25	5.01276e+12	8.41952e+12	8.4131e+12	5.05171e+12	8.33266e+18	1339.33	0.67356	2.52586e+10	2.52645e+10	2526446283933480	0.70918	2.52586e+10	8.77234e+09	0.707841
446.267	1.25	5.01113e+12	8.41615e+12	8.40971e+12	5.04969e+12	8.3271e+18	1337.54	0.67329	2.52484e+10	2.52543e+10	2525427299489590	0.70918	2.52484e+10	8.76947e+09	0.707838
446.095	1.25	5.00949e+12	8.41281e+12	8.40635e+12	5.04769e+12	8.3216e+18	1335.78	0.673024	2.52384e+10	2.52443e+10	2524420845708110	0.70918	2.52384e+10	8.7666e+09	0.707836
445.923	1.25	5007848915599	8.40952e+12	8.40304e+12	5.04571e+12	8.31618e+18	1334.04	0.67276	2.52286e+10	2.52343e+10	2523426122906120	0.70918	2.52286e+10	8.76374e+09	0.707834
445.751	1.25	5.00621e+12	8.40626e+12	8.39977e+12	5.04376e+12	8.31081e+18	1332.32	0.6725	2.52188e+10	2.52245e+10	2522442382119610	0.70918	2.52188e+10	8.76087e+09	0.707832
445.579	1.25	5.00457e+12	8.40304e+12	8.39652e+12	5.04182e+12	8.30549e+18	1330.61	0.672242	2.52091e+10	2.52147e+10	2521468921915480	0.70918	2.52091e+10	8.758e+09	0.70783
445.407	1.25	5.00293e+12	8.39984e+12	8.39331e+12	5.0399e+12	8.30023e+18	1328.93	0.671986	2.51995e+10	2.52051e+10	2520505085400900	0.70918	2.51995e+10	8.75513e+09	0.707828
445.235	1.25	5.00129e+12	8.39667e+12	8.39013e+12	5.038e+12	8.29502e+18	1327.26	0.671733	2.519e+10	2.51956e+10	2519550257418340	0.70918	2.519e+10	8.75227e+09	0.707826
445.063	1.25	4.99966e+12	8.39354e+12	8.38698e+12	5.03612e+12	8.28985e+18	1325.61	0.671482	2.51806e+10	2.51861e+10	2518603861914850	0.70918	2.51806e+10	8.7494e+09	0.707825
444.891	1.25	4.99802e+12	8.39042e+12	8.38386e+12	5.03425e+12	8.28473e+18	1323.97	0.671233	2.51713e+10	2.51767e+10	2517665359475230	0.70918	2.51713e+10	8.74653e+09	0.707823
444.719	1.25	4.99638e+12	8.38733e+12	8.38076e+12	5.0324e+12	8.27964e+18	1322.34	0.670985	2.5162e+10	2.51674e+10	2516734245008810	0.70918	2.5162e+10	8.74366e+09	0.707821
444.547	1.25	4.99474e+12	8.38426e+12	8.37768e+12	5.03056e+12	8.2746e+18	1320.73	0.67074	2.51528e+10	2.51581e+10	2515810045580780	0.70918	2.51528e+10	8.74079e+09	0.70782
444.375	1.25	4.9931e+12	8.38122e+12	8.37462e+12	5.02873e+12	8.26959e+18	1319.13	0.670496	2.51437e+10	2.5149e+10	2514892318378990	0.70918	2.51437e+10	8.73793e+09	0.707818
444.203	1.25	4.99146e+12	8.37819e+12	8.37159e+12	5.02691e+12	8.26461e+18	1317.54	0.670254	2.51346e+10	2.51399e+10	2513980648807970	0.70918	2.51346e+10	8.73506e+09	0.707816
444.031	1.25	4.98982e+12	8.37518e+12	8.36857e+12	5.02511e+12	8.25966e+18	1315.97	0.670013	2.51255e+10	2.51308e+10	2513074648702460	0.70918	2.51255e+10	8.73219e+09	0.707815
443.859	1.25	4.98819e+12	8.37219e+12	8.36557e+12	5.02331e+12	8.25474e+18	1314.4	0.669774	2.51166e+10	2.51218e+10	2512173954652850	0.70918	2.51166e+10	8.72932e+09	0.707813
443.687	1.25	4.98655e+12	8.36921e+12	8.36259e+12	5.02153e+12	8.24985e+18	1312.84	0.669536	2.51076e+10	2.51128e+10	2511278226435890	0.70918	2.51076e+10	8.72646e+09	0.707812
443.515	1.25	4.98491e+12	8.36625e+12	8359618794365	5.01975e+12	8.24499e+18	1311.3	0.669299	2.50987e+10	2.51039e+10	2510387145543930	0.70918	2.50987e+10	8.72359e+09	0.707811
443.343	1.25	4.98327e+12	8.3633e+12	8.35667e+12	5.01798e+12	8.24015e+18	1309.76	0.669063	2.50899e+10	2.5095e+10	2509500413806740	0.70918	2.50899e+10	8.72072e+09	0.707809
443.171	1.25	4.98163e+12	8.36037e+12	8.35373e+12	5.01622e+12	8.23533e+18	1308.23	0.668828	2.50811e+10	2.50862e+10	2508617752100050	0.70918	2.50811e+10	8.71785e+09	0.707808

## Sheet: G49860
Conwell, C.T., et al., 2022, Nd isotopic evidence for enhanced mafic weathering leading to Ordovician cooling: Geology, v. 50, https://doi.org/10.1130/G49860.1
